# Supplementary material for: The coefficient of determination R-squared is more informative than SMAPE, MAE, MAPE, MSE and RMSE in regression analysis evaluation
Source: PeerJ journal article supplement (doi:10.7717/peerj-cs.623), 2021-07-05
Supplement: supplementary_information_original.pdf [file supplementary_information_original.pdf]

|                   |      | $R^2$        | MAE   | MSE   | SMAPE | RMSE  | MAPE  |
|-------------------|------|--------------|-------|-------|-------|-------|-------|
| Random Forests    | mean | <b>0.756</b> | 0.149 | 0.133 | 1.808 | 0.361 | 0.092 |
| Random Forests    | s.d. | 0.073        | 0.025 | 0.041 | 0.035 | 0.058 | 0.017 |
| Linear Regression | mean | <b>0.535</b> | 0.283 | 0.260 | 1.840 | 0.498 | 0.197 |
| Linear Regression | s.d. | 0.196        | 0.036 | 0.134 | 0.034 | 0.108 | 0.018 |
| Decision Tree     | mean | <b>0.423</b> | 0.157 | 0.311 | 0.073 | 0.546 | 0.080 |
| Decision Tree     | s.d. | 0.197        | 0.050 | 0.120 | 0.023 | 0.113 | 0.032 |

**Table S1. Regression results on the prediction of hepatitis, cirrhosis, and fibrosis from electronic health records, including standard deviations.** Mean values and standard deviations out of 100 executions with 80% randomly chosen data elements used for the training set and the remaining 20% used for the test set. We performed the analysis on the Lichtinghagen dataset (Lichtinghagen et al., 2013; Hoffmann et al., 2018) with the methods employed by Chicco and Jurman (2021).  $R^2$ : worst value  $-\infty$  and best value  $+1$ . SMAPE: worst value 2 and best value 0. MAE, RMSE, MAPE, MSE: worst value  $+\infty$  and best value 0.

|                   |      | $R^2$        | MAE   | MSE   | SMAPE | RMSE  | MAPE  |
|-------------------|------|--------------|-------|-------|-------|-------|-------|
| Random Forests    | mean | <b>0.865</b> | 0.412 | 0.512 | 0.087 | 0.714 | 0.094 |
| Random Forests    | s.d. | 0.017        | 0.028 | 0.067 | 0.006 | 0.047 | 0.007 |
| Decision Tree     | mean | <b>0.426</b> | 1.214 | 2.170 | 0.326 | 1.471 | 0.286 |
| Decision Tree     | s.d. | 0.064        | 0.043 | 0.236 | 0.012 | 0.078 | 0.010 |
| Linear Regression | mean | <b>0.254</b> | 1.417 | 2.828 | 0.296 | 1.681 | 0.325 |
| Linear Regression | s.d. | 0.030        | 0.034 | 0.117 | 0.007 | 0.035 | 0.011 |

**Table S2. Regression results on the prediction of obesity level from electronic health records, including standard deviations.** Mean values and standard deviations out of 100 executions with 80% randomly chosen data elements used for the training set and the remaining 20% used for the test set. We performed the analysis on the Palechor dataset (Palechor and De-La-Hoz-Manotas, 2019; De-La-Hoz-Correa et al., 2019) with the methods Linear Regression, Decision Tree, and Random Forests.  $R^2$ : worst value  $-\infty$  and best value  $+1$ . SMAPE: worst value 2 and best value 0. MAE, RMSE, MAPE, MSE: worst value  $+\infty$  and best value 0.
